# Supplementary material for: {Gd44Ni22}: a gigantic 3d–4f wheel-like nanoscale cluster with a large magnetocaloric effect
Source: Royal Society of Chemistry journal article supplement (doi:10.1039/d2qi02294j), 2022-12-13
Supplement: d2qi02294j1.pdf [file d2qi02294j1.pdf]

## Electronic Supplementary Information

# **{Gd<sub>44</sub>Ni<sub>22</sub>}: A Gigantic 3d-4f Wheel-like Cluster with Large Magnetocaloric Effect**

Zixiu Lu,<sup>ab</sup> Zhu Zhuo,<sup>cd</sup> Wei Wang,<sup>cd\*</sup> You-Gui Huang,<sup>cd\*</sup> and Maochun

Hong<sup>abd</sup>

<sup>a</sup> Ganjiang Innovation Academy, Chinese Academy of Sciences, Ganzhou 341000,  
China

<sup>b</sup> School of Rare Earth, University of Science and Technology of China, Hefei, China.

<sup>c</sup> CAS Key Laboratory of Design and Assembly of Functional Nanostructures, and  
Fujian Provincial Key Laboratory of Nanomaterials, Fujian Institute of Research on  
the Structure of Matter, Chinese Academy of Sciences, China

<sup>d</sup> Xiamen Key Laboratory of Rare Earth Photoelectric Functional Materials, Xiamen  
Institute of Rare Earth Materials, Haixi Institutes, Chinese Academy of Sciences,  
Xiamen, Fujian 361021, China;

<sup>e</sup> Fujian Science & Technology Innovation Laboratory for Optoelectronic Information  
of China, Fuzhou, 350108

\*Corresponding author:

Wei Wang: wangwei@fjirsm.ac.cn;

You-Gui Huang: yghuang@fjirsm.ac.cn.

## Contents

### 1. Materials and Measurements

1.1 Chemicals and Physical Measurements.

1.2 Synthesis of  $[\text{Gd}_{44}\text{Ni}_{22}(\text{CO}_3)_{16}(\text{NO}_3)_4(\text{H}_2\text{O})_{58}(\mu_3\text{-OH})_{76}(\mu_2\text{-O})_6(\text{IDA})_{28}(\text{H}_2\text{dmpa})_2] \cdot (\text{H}_2\text{O})_x$  (**1**,  $x \approx 118$ ).

1.3 X-ray Crystallography.

### 2. Supplementary Tables.

**Table S1.** Crystallographic Data and Structure Refinements for **1**.

**Table S2.** Selected bond lengths [ $\text{\AA}$ ] for **1**.

**Table S3.** Selected BVS calculations for Ni, C (in  $\text{CO}_3^{2-}$ ), N (in  $\text{NO}_3^-$ ), and O atoms in **1**.

**Table S4.** Magnetic entropy changes for selected high-nuclearity  $\text{Gd}^{\text{III}}$ -based cluster materials.

### 3. Supplementary Figures

**Figure S1** SEM images of **1**.

**Figure S2** The coordination mode of  $\text{Gd}^{3+}$  and  $\text{Ni}^{2+}$  in **1**.

**Figure S3** (a) The space-filling view of **1**; (b) wireframe view of the packing mode of **1** aggregation.

**Figure S4** Calculated and experimental XRD patterns for **1**. The purple curve is the calculated one obtained from single-crystal X-ray structure analysis.

**Figure S5** FTIR spectra of **1**.

**Figure S6** The thermogravimetric (TG) analysis and differential scanning calorimetry (DSC) curve of **1**.

**Figure S7** Plots of temperature dependence of  $\chi_m T$  vs  $T$  and  $\chi_M^{-1}$  vs  $T$  (inset) of wheel-like  $\{\text{Gd}_{44}\text{Ni}_{22}\}$  cluster.

**Figure S8** Experimental magnetization curve of **1** at 2 K.

## 1. Materials and Measurements

### 1.1 Chemicals and Physical Measurements.

Commercial chemicals,  $\text{Gd}(\text{NO}_3)_3 \cdot 6\text{H}_2\text{O}$  (Adamas Co., Ltd., >99.0 %),  $\text{Ni}(\text{NO}_3)_2 \cdot 6\text{H}_2\text{O}$  (Adamas Co., Ltd., 99.99 %), NaOH (Greagent Co., Ltd., 96.0 %), 3-Hydroxy-2-(hydroxymethyl)-2-methylpropanoic acid ( $\text{H}_3\text{dmpa}$ , Bide Co., Ltd., 95.0 %) and Iminodiacetic acid (IDA, Bide Co., Ltd., 98.0 % ) were used as received without further purification. NaOH (3.0 mol/L, 250 ml) was prepared using conventional methods. Infrared spectrum was recorded on a Thermo Nicolet iS 50 spectrophotometers. Thermogravimetric analysis (TGA) curve was carried out under nitrogen with a heating rate of 10 °C/min using Mettler Telodo TGA/DSC-1 thermal analyzer. Powder X-ray diffraction data (PXRD) was recorded on a Miniflex 600 powder X-ray diffractometer ( $\text{Cu } K\alpha$ ,  $\lambda = 1.54184 \text{ \AA}$ ) in the  $2\theta$  range of 3–50° at room temperature. Magnetic susceptibility was measured using a Quantum Design MPMS superconducting quantum interference device (SQUID). Diamagnetic corrections were made with Pascal's constants. The magnetic susceptibility was performed in 2–300 K under a dc field of 1000 Oe. The isothermal magnetization was measured at 2–10 K in applied field of 0–7 T. The M–H curves at each temperature were measured with step size of 1000 Oe during 0–2 T and that of 2000 Oe during 2–7 T.

### 1.2 Synthesis of $[\text{Gd}_{44}\text{Ni}_{22}(\text{CO}_3)_{16}(\text{NO}_3)_4(\text{H}_2\text{O})_{58}(\mu_3\text{-OH})_{76}(\mu_2\text{-O})_6(\text{IDA})_{28}(\text{H}_2\text{dmpa})_2] \cdot (\text{H}_2\text{O})_x$ (1, $x \approx 118$ ).

Hydroxy-2-(hydroxymethyl)-2-methylpropanoic acid ( $\text{H}_3\text{dmpa}$ , 0.1251 g, 0.93 mmol), Iminodiacetic acid (IDA, 0.1290 g, 0.97 mmol),  $\text{Gd}(\text{NO}_3)_3 \cdot 6\text{H}_2\text{O}$  (1.0769 g, 2.39 mmol), and  $\text{Ni}(\text{NO}_3)_2 \cdot 4\text{H}_2\text{O}$  (0.6983 g, 2.40 mmol) were dissolved in the 10 ml  $\text{H}_2\text{O}$ . This solution was stirred for 24 h and then a freshly prepared NaOH solution (aq. 3.0 M) drop wised to the mixture to the point of incipient but permanent precipitation ( $\text{PH} \approx 6$ ). The mixture solution was filtered and sealed in a 25 mL Teflon-lined stain less steel vessel and heated at 140 °C for 4 days. At a rate of 5 °C/h, the system was

allowed to cool to room temperature. Evaporation of the filtrate in a beaker under ambient conditions afforded the block-shaped light green crystals of **1** after about 20 days (yield 50 % based on Gd<sup>3+</sup>). Elemental analysis calcd (%) for **1**: C 9.73, H 3.54, N 2.79; Found: C 9.62, H 2.60, N 2.69. IR (KBr, cm<sup>-1</sup>): 3241 (m), 1577 (s), 1504 (w), 1458 (w), 1412 (s), 1316 (w), 1087 (w), 932 (w), 827 (w), 717 (w).

### 1.3 X-ray Crystallography.

Single-crystal X-ray diffraction data of **1** were collected at 200(2) K on the Bruker SMART diffractometer with monochromatic Mo *K* $\alpha$  radiation ( $\lambda = 0.71073 \text{ \AA}$ ). The structure was solved by direct methods and all non-H atoms were subjected to anisotropic refinement by full-matrix least-squares refinement on  $F^2$  using SHELXL-2018 within Olex<sup>2,1,2</sup>. All non-hydrogen atoms were refined anisotropically. The hydrogen atoms of organic ligand were generated geometrically (C–H = 0.96  $\text{\AA}$ , N–H = 0.90  $\text{\AA}$ ). The contribution of the disordered solvent molecules was subtracted from the reflection data by the SQUEEZE method as implanted in PLATON program.<sup>3-6</sup> There are 39 disordered water molecules per formula were removed by SQUEEZE in the refinement, but accurately confirmed by TG, elemental analyses and charge balance. Refinement parameters and crystallographic data for **1** are shown in Table S1–S2. CCDC-2208968 contains the supplementary crystallographic data. This data can be obtained free of charge via [www.ccdc.cam.ac.uk/data\\_request/cif](http://www.ccdc.cam.ac.uk/data_request/cif).

## 2. Supplementary Tables

**Table S1.** Crystallographic Data and Structure Refinements for **1**.

|                                                                                       |                                                                                                      |
|---------------------------------------------------------------------------------------|------------------------------------------------------------------------------------------------------|
| Complex                                                                               | {Gd <sub>44</sub> Ni <sub>22</sub> } ( <b>1</b> )                                                    |
| formula                                                                               | Gd <sub>44</sub> Ni <sub>22</sub> C <sub>130</sub> N <sub>32</sub> O <sub>314</sub> H <sub>356</sub> |
| fw                                                                                    | 15603.07                                                                                             |
| crystal system                                                                        | Monoclinic                                                                                           |
| space group                                                                           | <i>P2<sub>1</sub>/n</i>                                                                              |
| <i>a</i> , Å                                                                          | 20.2655(2)                                                                                           |
| <i>b</i> , Å                                                                          | 34.6370(6)                                                                                           |
| <i>c</i> , Å                                                                          | 40.1162(4)                                                                                           |
| <i>α</i> , deg                                                                        | 90                                                                                                   |
| <i>β</i> , deg                                                                        | 91.9750(10)                                                                                          |
| <i>γ</i> , deg                                                                        | 90                                                                                                   |
| <i>V</i> , Å <sup>3</sup>                                                             | 28142.3(6)                                                                                           |
| <i>Z</i>                                                                              | 2                                                                                                    |
| <i>D<sub>c</sub></i> / g cm <sup>-3</sup>                                             | 1.841                                                                                                |
| <i>T</i> , K                                                                          | 200.00                                                                                               |
| <i>F</i> (000)                                                                        | 145608.0                                                                                             |
| reflections collected /                                                               | 182894                                                                                               |
| unique                                                                                | /51512                                                                                               |
| <i>R<sub>int</sub></i>                                                                | 0.0909                                                                                               |
| GOF on <i>F</i> <sup>2</sup>                                                          | 1.102                                                                                                |
| <i>R</i> <sub>1</sub> , <i>wR</i> <sub>2</sub> <i>I</i> > 2σ( <i>I</i> ) <sup>a</sup> | 0.0668, 0.1892                                                                                       |
| <i>R</i> <sub>1</sub> , <i>wR</i> <sub>2</sub> (all data)                             | 0.0870, 0.1991                                                                                       |
| CCDC Number                                                                           | 2208968                                                                                              |

<sup>[a]</sup>*R*<sub>1</sub> = Σ||*F*<sub>o</sub>| - |*F*|| / Σ|*F*<sub>o</sub>| and *wR*<sub>2</sub> = [Σ*w*(*F*<sub>o</sub><sup>2</sup> - *F*<sub>c</sub><sup>2</sup>)<sup>2</sup> / Σ*wF*<sub>o</sub><sup>4</sup>]<sup>1/2</sup> for *F*<sub>o</sub><sup>2</sup> > 2σ(*F*<sub>o</sub><sup>2</sup>)

**Table S2.** Selected bond lengths [Å] for **1**.

|             |          |               |          |              |           |
|-------------|----------|---------------|----------|--------------|-----------|
| Gd(1)-O(4)  | 2.390(6) | Gd(12)-O(60)  | 2.539(7) | Ni(1)-N(8)   | 2.038(10) |
| Gd(1)-O(6)  | 2.450(8) | Gd(12)-O(80)  | 2.417(7) | Ni(2)-O(64)  | 2.017(8)  |
| Gd(1)-O(14) | 2.393(7) | Gd(12)-O(82)  | 2.348(6) | Ni(2)-O(94)  | 2.056(8)  |
| Gd(1)-O(18) | 2.388(7) | Gd(12)-O(108) | 2.293(6) | Ni(2)-O(132) | 2.032(8)  |
| Gd(1)-O(24) | 2.375(6) | Gd(12)-O(114) | 2.540(7) | Ni(2)-N(17)  | 2.102(11) |
| Gd(1)-O(40) | 2.433(7) | Gd(12)-O(134) | 2.588(8) | Ni(2)-O(127) | 2.038(10) |
| Gd(1)-O(46) | 2.444(7) | Gd(12)-O(95)  | 2.425(8) | Ni(2)-O(37)  | 2.058(10) |

|               |           |                 |           |                |           |
|---------------|-----------|-----------------|-----------|----------------|-----------|
| Gd(1)-O(82)   | 2.405(7)  | Gd(13)-O(44)#1  | 2.482(7)  | Ni(3)-O(32)    | 2.046(7)  |
| Gd(1)-O(104)  | 2.425(7)  | Gd(13)-O(76)    | 2.355(8)  | Ni(3)-O(50)    | 2.041(9)  |
| Gd(2)-O(62)   | 2.672(8)  | Gd(13)-O(78)    | 2.442(7)  | Ni(3)-O(92)    | 2.025(9)  |
| Gd(2)-O(84)   | 2.358(7)  | Gd(13)-O(100)#1 | 2.487(8)  | Ni(3)-O(136)   | 2.052(7)  |
| Gd(2)-O(116)  | 2.381(8)  | Gd(13)-O(41)#1  | 2.433(8)  | Ni(3)-O(81)    | 2.045(7)  |
| Gd(2)-O(118)  | 2.319(8)  | Gd(13)-O(99)    | 2.390(8)  | Ni(3)-N(16)    | 2.082(9)  |
| Gd(2)-O(128)  | 2.430(8)  | Gd(13)-O(103)   | 2.483(9)  | Ni(4)-O(10)    | 2.042(7)  |
| Gd(2)-O(140)  | 2.707(8)  | Gd(13)-O(107)   | 2.416(10) | Ni(4)-O(54)    | 2.071(7)  |
| Gd(2)-O(83)   | 2.308(8)  | Gd(13)-O(117)   | 2.659(12) | Ni(4)-O(96)    | 1.991(8)  |
| Gd(2)-O(89)   | 2.433(8)  | Gd(14)-O(38)    | 2.386(7)  | Ni(4)-O(102)   | 2.095(8)  |
| Gd(2)-O(129)  | 2.499(14) | Gd(14)-O(66)    | 2.457(8)  | Ni(4)-O(79)    | 2.045(8)  |
| Gd(3)-O(22)   | 2.540(7)  | Gd(14)-O(98)    | 2.431(8)  | Ni(4)-N(6)     | 2.039(10) |
| Gd(3)-O(36)#1 | 2.344(8)  | Gd(14)-O(138)   | 2.496(7)  | Ni(5)-O(100)   | 2.028(8)  |
| Gd(3)-O(76)   | 2.504(8)  | Gd(14)-O(142)   | 2.334(6)  | Ni(5)-O(112)   | 2.058(8)  |
| Gd(3)-O(78)   | 2.370(7)  | Gd(14)-O(5)     | 2.501(7)  | Ni(5)-O(41)    | 2.032(9)  |
| Gd(3)-O(150)  | 2.316(8)  | Gd(14)-O(43)    | 2.262(7)  | Ni(5)-O(27)    | 2.030(9)  |
| Gd(3)-O(154)  | 2.393(7)  | Gd(14)-O(23)    | 2.421(8)  | Ni(5)-O(29)    | 2.055(10) |
| Gd(3)-O(3)    | 2.421(9)  | Gd(14)-O(49)    | 2.610(8)  | Ni(5)-N(5)     | 2.111(11) |
| Gd(3)-O(25)#1 | 2.401(9)  | Gd(15)-O(108)   | 2.417(8)  | Ni(6)-O(28)    | 2.102(7)  |
| Gd(3)-O(143)  | 2.94(2)   | Gd(15)-O(134)   | 2.373(7)  | Ni(6)-O(30)    | 2.080(8)  |
| Gd(4)-O(1)    | 2.493(7)  | Gd(15)-O(91)    | 2.497(8)  | Ni(6)-O(74)    | 2.026(8)  |
| Gd(4)-O(4)    | 2.433(6)  | Gd(15)-O(51)    | 2.399(8)  | Ni(6)-O(138)   | 2.055(7)  |
| Gd(4)-O(16)   | 2.528(7)  | Gd(15)-O(111)   | 2.444(8)  | Ni(6)-O(142)   | 2.006(7)  |
| Gd(4)-O(32)   | 2.350(8)  | Gd(15)-O(61)    | 2.472(9)  | Ni(6)-N(4)     | 2.077(10) |
| Gd(4)-O(34)   | 2.495(8)  | Gd(15)-O(63)    | 2.425(9)  | Ni(7)-O(26)    | 2.045(7)  |
| Gd(4)-O(40)   | 2.354(7)  | Gd(15)-O(2)     | 2.388(11) | Ni(7)-O(72)    | 2.069(8)  |
| Gd(4)-O(88)   | 2.449(7)  | Gd(15)-O(139)   | 2.587(15) | Ni(7)-O(80)    | 2.036(7)  |
| Gd(4)-O(152)  | 2.485(7)  | Gd(16)-O(20)#1  | 2.333(7)  | Ni(7)-O(86)    | 2.026(8)  |
| Gd(4)-O(81)   | 2.446(7)  | Gd(16)-O(22)    | 2.345(7)  | Ni(7)-O(13)    | 2.094(7)  |
| Gd(5)-O(110)  | 2.462(9)  | Gd(16)-O(36)#1  | 2.457(7)  | Ni(7)-N(14)    | 2.156(12) |
| Gd(5)-O(118)  | 2.361(8)  | Gd(16)-O(56)#1  | 2.437(7)  | Ni(8)-O(60)    | 2.037(7)  |
| Gd(5)-O(128)  | 2.294(9)  | Gd(16)-O(64)    | 2.424(7)  | Ni(8)-O(82)    | 1.983(7)  |
| Gd(5)-O(31)   | 2.204(13) | Gd(16)-O(94)    | 2.440(7)  | Ni(8)-O(104)   | 2.046(7)  |
| Gd(5)-O(129)  | 2.881(13) | Gd(16)-O(126)#1 | 2.529(7)  | Ni(8)-O(144)   | 2.089(7)  |
| Gd(5)-O(71)   | 2.275(17) | Gd(16)-O(157)#1 | 2.550(7)  | Ni(8)-O(148)   | 2.064(8)  |
| Gd(5)-O(151)  | 2.35(3)   | Gd(16)-O(101)   | 2.483(9)  | Ni(8)-N(1)     | 2.071(9)  |
| Gd(5)-O(19)   | 2.72(2)   | Gd(17)-O(78)    | 2.428(7)  | Ni(9)-O(66)    | 2.062(7)  |
| Gd(6)-O(10)   | 2.435(8)  | Gd(17)-O(154)   | 2.422(7)  | Ni(9)-O(98)    | 2.009(8)  |
| Gd(6)-O(20)   | 2.411(7)  | Gd(17)-O(99)    | 2.361(8)  | Ni(9)-O(87)    | 2.029(9)  |
| Gd(6)-O(38)   | 2.372(6)  | Gd(17)-O(105)   | 2.377(10) | Ni(9)-O(97)    | 2.063(8)  |
| Gd(6)-O(56)   | 2.400(7)  | Gd(17)-O(113)#1 | 2.352(10) | Ni(9)-O(59)    | 2.067(8)  |
| Gd(6)-O(58)   | 2.412(7)  | Gd(17)-O(135)   | 2.519(13) | Ni(9)-N(11)    | 2.117(10) |
| Gd(6)-O(68)   | 2.351(7)  | Gd(17)-O(143)   | 2.387(15) | Ni(10)-O(20)   | 2.014(7)  |
| Gd(6)-O(74)   | 2.443(7)  | Gd(17)-O(145)   | 2.412(14) | Ni(10)-O(58)   | 2.068(8)  |
| Gd(6)-O(96)   | 2.410(7)  | Gd(18)-O(1)     | 2.314(7)  | Ni(10)-O(70)   | 2.063(8)  |
| Gd(6)-O(142)  | 2.420(7)  | Gd(18)-O(42)    | 2.422(7)  | Ni(10)-O(157)  | 2.008(8)  |
| Gd(7)-O(98)   | 2.383(7)  | Gd(18)-O(62)    | 2.494(7)  | Ni(10)-O(85)#1 | 2.015(8)  |
| Gd(7)-O(110)  | 2.333(8)  | Gd(18)-O(84)    | 2.364(7)  | Ni(10)-N(10)   | 2.071(10) |
| Gd(7)-O(116)  | 2.363(7)  | Gd(18)-O(90)    | 2.468(8)  | Ni(11)-O(18)   | 1.996(6)  |

|               |           |               |           |                            |            |
|---------------|-----------|---------------|-----------|----------------------------|------------|
| Gd(7)-O(118)  | 2.401(8)  | Gd(18)-O(152) | 2.564(7)  | Ni(11)-O(46)               | 2.053(8)   |
| Gd(7)-O(146)  | 2.472(9)  | Gd(18)-O(156) | 2.533(9)  | Ni(11)-O(106)              | 2.077(9)   |
| Gd(7)-O(5)    | 2.444(7)  | Gd(18)-O(89)  | 2.406(9)  | Ni(11)-O(122)              | 2.029(8)   |
| Gd(7)-O(93)   | 2.443(7)  | Gd(18)-N(13)  | 2.561(10) | Ni(11)-O(45)               | 2.048(8)   |
| Gd(7)-O(97)   | 2.434(8)  | Gd(19)-O(119) | 2.427(10) | Ni(11)-N(12)               | 2.071(9)   |
| Gd(8)-O(14)   | 2.450(7)  | Gd(19)-O(15)  | 2.592(12) | Gd(2)-Gd(21)               | 3.6313(14) |
| Gd(8)-O(18)   | 2.355(7)  | Gd(19)-O(121) | 2.372(11) | Gd(2)-Gd(5)                | 3.6175(13) |
| Gd(8)-O(22)   | 2.356(7)  | Gd(19)-O(125) | 2.357(10) | Gd(3)-Gd(13)               | 3.9330(8)  |
| Gd(8)-O(64)   | 2.412(7)  | Gd(19)-O(67)  | 2.455(11) | Gd(3)-Gd(17)               | 3.7495(8)  |
| Gd(8)-O(122)  | 2.549(7)  | Gd(19)-O(17)  | 2.498(13) | Gd(7)-Gd(2)                | 3.7546(8)  |
| Gd(8)-O(130)  | 2.546(7)  | Gd(19)-O(69)  | 2.428(14) | Gd(7)-Gd(5)                | 3.8826(14) |
| Gd(8)-O(132)  | 2.474(7)  | Gd(19)-O(35)  | 2.480(13) | Gd(8)-Gd(16)               | 3.8300(9)  |
| Gd(8)-O(150)  | 2.454(7)  | Gd(19)-O(73)  | 2.414(13) | Gd(11)-Gd(7)               | 3.8326(7)  |
| Gd(8)-O(55)   | 2.462(9)  | Gd(20)-O(72)  | 2.387(8)  | Gd(11)-Gd(2)               | 3.6592(8)  |
| Gd(9)-O(43)   | 2.426(9)  | Gd(20)-O(80)  | 2.400(7)  | Gd(11)-Gd(5)               | 3.9706(14) |
| Gd(9)-O(49)   | 2.348(7)  | Gd(20)-O(84)  | 2.343(7)  | Gd(13)-Gd(17)              | 3.8977(9)  |
| Gd(9)-O(109)  | 2.469(8)  | Gd(20)-O(90)  | 2.331(7)  | Gd(18)-Gd(20)              | 3.8247(7)  |
| Gd(9)-O(7)    | 2.467(10) | Gd(20)-O(114) | 2.430(7)  | Gd(18)-Gd(2)               | 3.6506(7)  |
| Gd(9)-O(57)   | 2.382(9)  | Gd(20)-O(83)  | 2.384(8)  | Gd(18)-Gd(21)              | 3.9519(14) |
| Gd(9)-C(64)   | 2.893(15) | Gd(20)-O(21)  | 2.463(9)  | Gd(20)-Gd(2)               | 3.7564(8)  |
| Gd(9)-O(131)  | 2.481(13) | Gd(20)-O(11)  | 2.414(7)  | Gd(20)-Gd(21)              | 3.8920(15) |
| Gd(9)-O(33)   | 2.445(12) | Gd(21)-O(90)  | 2.455(8)  | Gd(22)-Gd(3)               | 3.9325(8)  |
| Gd(9)-O(147)  | 2.377(14) | Gd(21)-O(83)  | 2.369(8)  | Gd(22)-Gd(13)              | 3.7454(9)  |
| Gd(10)-O(8)   | 2.488(7)  | Gd(21)-O(89)  | 2.244(8)  | Gd(22)-Gd(17)              | 3.8591(8)  |
| Gd(10)-O(44)  | 2.506(8)  | Gd(21)-O(65)  | 2.198(14) | Gd(1)-Ni(1)                | 3.4641(14) |
| Gd(10)-O(54)  | 2.503(8)  | Gd(21)-O(141) | 2.277(19) | Gd(1)-Ni(8)                | 3.4572(16) |
| Gd(10)-O(68)  | 2.471(7)  | Gd(21)-O(149) | 2.665(17) | Gd(1)-Ni(11)               | 3.4525(15) |
| Gd(10)-O(96)  | 2.378(7)  | Gd(21)-O(75)  | 2.300(3)  | Gd(4)-Ni(1)                | 3.5241(15) |
| Gd(10)-O(100) | 2.367(7)  | Gd(21)-O(153) | 2.590(3)  | Gd(4)-Ni(3)                | 3.4548(14) |
| Gd(10)-O(112) | 2.437(7)  | Gd(22)-O(16)  | 2.481(7)  | Gd(6)-Ni(4)                | 3.4656(15) |
| Gd(10)-O(120) | 2.480(8)  | Gd(22)-O(32)  | 2.474(8)  | Gd(6)-Ni(6)                | 3.4616(16) |
| Gd(10)-O(115) | 2.432(8)  | Gd(22)-O(50)  | 2.412(8)  | Gd(6)-Ni(10)               | 3.4605(15) |
| Gd(11)-O(8)   | 2.284(7)  | Gd(22)-O(76)  | 2.380(7)  | Gd(7)-Ni(9)                | 3.5273(16) |
| Gd(11)-O(48)  | 2.445(7)  | Gd(22)-O(124) | 2.447(8)  | Gd(8)-Ni(2)                | 3.5099(17) |
| Gd(11)-O(110) | 2.477(8)  | Gd(22)-O(154) | 2.419(7)  | Gd(10)-Ni(4)               | 3.5301(15) |
| Gd(11)-O(116) | 2.377(7)  | Gd(22)-O(47)  | 2.427(8)  | Gd(10)-Ni(5)               | 3.4536(16) |
| Gd(11)-O(120) | 2.569(8)  | Gd(22)-O(99)  | 2.406(8)  | Gd(12)-Ni(8)               | 3.5381(15) |
| Gd(11)-O(128) | 2.376(9)  | Gd(22)-O(117) | 2.597(11) | Gd(12)-Ni(7)               | 3.4923(17) |
| Gd(11)-O(140) | 2.504(8)  | Ni(1)-O(6)    | 2.041(7)  | Gd(13)-Ni(5) <sup>#1</sup> | 3.5252(19) |
| Gd(11)-O(53)  | 2.593(10) | Ni(1)-O(12)   | 2.015(7)  | Gd(14)-Ni(6)               | 3.5362(15) |
| Gd(11)-N(3)   | 2.571(10) | Ni(1)-O(34)   | 2.064(7)  | Gd(14)-Ni(9)               | 3.4878(18) |
| Gd(12)-O(24)  | 2.376(7)  | Ni(1)-O(40)   | 2.004(7)  | Gd(16)-Ni(2)               | 3.5193(17) |
| Gd(12)-O(26)  | 2.455(7)  | Ni(1)-O(52)   | 2.089(7)  | Gd(20)-Ni(7)               | 3.5178(16) |

Symmetry transformations used to generate equivalent atoms:

#1  $-x+1, -y+1, -z+1$

**Table S3.** Selected BVS calculations for Ni, C (in CO<sub>3</sub><sup>2-</sup>), N (in NO<sub>3</sub><sup>-</sup>), and O atoms in **1**.

|      |      |      |      |      |      |      |         |
|------|------|------|------|------|------|------|---------|
| Atom | N8   | O12  | O34  | O40  | O52  | O6   | Σcation |
| Ni1  | 0.34 | 0.37 | 0.33 | 0.38 | 0.31 | 0.35 | 2.08    |
| Atom | N17  | O127 | O132 | O37  | O64  | O94  | Σcation |
| Ni2  | 0.29 | 0.36 | 0.36 | 0.33 | 0.37 | 0.34 | 2.05    |
| Atom | N16  | O136 | O32  | O50  | O81  | O92  | Σcation |
| Ni3  | 0.31 | 0.34 | 0.35 | 0.35 | 0.35 | 0.37 | 2.07    |
| Atom | N6   | O10  | O102 | O54  | O79  | O96  | Σcation |
| Ni4  | 0.35 | 0.35 | 0.30 | 0.32 | 0.35 | 0.40 | 2.07    |
| Atom | N5   | O100 | O112 | O27  | O29  | O41  | Σcation |
| Ni5  | 0.29 | 0.36 | 0.33 | 0.36 | 0.34 | 0.36 | 2.05    |
| Atom | N4   | O138 | O142 | O28  | O30  | O74  | Σcation |
| Ni6  | 0.32 | 0.34 | 0.39 | 0.30 | 0.32 | 0.37 | 2.02    |
| Atom | N14  | O13  | O26  | O72  | O80  | O86  | Σcation |
| Ni7  | 0.25 | 0.30 | 0.35 | 0.33 | 0.35 | 0.36 | 1.95    |
| Atom | N1   | O104 | O144 | O148 | O60  | O82  | Σcation |
| Ni8  | 0.32 | 0.35 | 0.31 | 0.33 | 0.35 | 0.41 | 2.06    |
| Atom | N11  | O59  | O66  | O87  | O97  | O98  | Σcation |
| Ni9  | 0.28 | 0.33 | 0.33 | 0.36 | 0.33 | 0.38 | 2.02    |
| Atom | N10  | O157 | O20  | O58  | O70  | O85  | Σcation |
| Ni10 | 0.32 | 0.38 | 0.38 | 0.33 | 0.33 | 0.38 | 2.11    |
| Atom | N12  | O106 | O122 | O18  | O45  | O46  | Σcation |
| Ni11 | 0.32 | 0.32 | 0.36 | 0.40 | 0.35 | 0.34 | 2.08    |
| Atom | N12  | O106 | O122 | O18  | O45  | O46  | Σcation |
| Ni11 | 0.32 | 0.32 | 0.36 | 0.40 | 0.35 | 0.34 | 2.08    |
| Atom | O4   | O114 | O1   | —    | —    | —    | Σcation |
| C1   | 1.44 | 1.37 | 1.23 | —    | —    | —    | 4.04    |
| Atom | O16  | O150 | O14  | —    | —    | —    | Σcation |
| C4   | 1.42 | 1.38 | 1.25 | —    | —    | —    | 4.05    |
| Atom | O130 | O134 | O24  | —    | —    | —    | Σcation |
| C8   | 1.41 | 1.33 | 1.21 | —    | —    | —    | 3.95    |
| Atom | O44  | O56  | O36  | —    | —    | —    | Σcation |
| C9   | 1.35 | 1.37 | 1.30 | —    | —    | —    | 4.02    |
| Atom | O68  | O5   | O8   | —    | —    | —    | Σcation |
| C12  | 1.32 | 1.42 | 1.15 | —    | —    | —    | 3.89    |
| Atom | O126 | O49  | O38  | —    | —    | —    | Σcation |
| C32  | 1.47 | 1.26 | 1.23 | —    | —    | —    | 3.96    |
| Atom | O108 | O91  | O86  | —    | —    | —    | Σcation |
| C38  | 1.32 | 1.29 | 1.32 | —    | —    | —    | 3.93    |
| Atom | O87  | O7   | O43  | —    | —    | —    | Σcation |
| C64  | 1.43 | 1.31 | 1.19 | —    | —    | —    | 3.93    |
| Atom | O155 | O39  | O77  | —    | —    | —    | Σcation |
| N2   | 1.51 | 1.65 | 1.78 | —    | —    | —    | 4.94    |
| Atom | O17  | O137 | O15  | —    | —    | —    | Σcation |
| N7   | 1.61 | 1.61 | 1.71 | —    | —    | —    | 4.93    |



|      |      |      |      |   |   |   |                          |
|------|------|------|------|---|---|---|--------------------------|
| Atom | O155 | O39  | O77  | — | — | — | $\Sigma_{\text{cation}}$ |
| N15  | 1.83 | 1.25 | 1.82 | — | — | — | 4.90                     |
| Atom | Gd13 | Gd22 | —    | — | — | — | $\Sigma_{\text{cation}}$ |
| O117 | 0.18 | 0.22 | —    | — | — | — | 0.40                     |
| Atom | Gd5  | Gd21 | Gd2  | — | — | — | $\Sigma_{\text{cation}}$ |
| O129 | 0.10 | 0.06 | 0.28 | — | — | — | 0.44                     |
| Atom | Gd17 | Gd3  | —    | — | — | — | $\Sigma_{\text{cation}}$ |
| O143 | 0.38 | 0.08 | —    | — | — | — | 0.46                     |

\*The bond valence was calculated by the equation:  $S = \exp((R_0 - R)/b)$  where where  $S$  is the experimental bond valence,  $R$  the observed bond length, and  $R_0$  and  $b$  are fitted bond valence parameters.  $R_0$  of Ni–O, Ni–N, C–O, N–O are 1.654, 1.647, 1.390, 1.432 and  $b = 0.37$ . Bond valence sum (BVS) calculations were performed for selected atoms of the asymmetric unit (Ni, 1.95–2.11; C, 3.89–4.05; N, 4.90–4.94), which are consistent with the expected valence values (+2; +4; +5) and confirm the reliability of the structure.

**Table S4.** Magnetic entropy changes for selected high-nuclearity Gd<sup>III</sup>-based cluster materials.

| Compound                              | $-\Delta S_{\text{max}}$<br>(J·kg <sup>-1</sup> ·K <sup>-1</sup> ) | T<br>(K) | $\Delta H$<br>(T) | Ref       |
|---------------------------------------|--------------------------------------------------------------------|----------|-------------------|-----------|
| {Gd <sub>60</sub> }                   | 48.0                                                               | 2.0      | 7                 | 7         |
| {Gd <sub>104</sub> }                  | 46.9                                                               | 2        | 7                 | 8         |
| {Gd <sub>24</sub> }                   | 46.1                                                               | 2.5      | 7                 | 9         |
| {Gd <sub>48</sub> }                   | 43.6                                                               | 1.8      | 7                 | 10        |
| {Gd <sub>27</sub> }                   | 41.8                                                               | 2.0      | 7                 | 11        |
| {Gd <sub>36</sub> }                   | 39.7                                                               | 2.5      | 7                 | 12        |
| {Gd <sub>37</sub> }                   | 38.7                                                               | 2.0      | 7                 | 13        |
| {Gd <sub>140</sub> }                  | 38.0                                                               | 2.0      | 7                 | 14        |
| {Gd <sub>38</sub> }                   | 37.9                                                               | 1.8      | 7                 | 15        |
| {Gd <sub>158</sub> Co <sub>38</sub> } | 46.9                                                               | 2        | 7                 | 16        |
| {Gd <sub>44</sub> Ni <sub>22</sub> }  | 44.9                                                               | 2        | 7                 | This work |
| {Gd <sub>30</sub> Co <sub>12</sub> }  | 44.7                                                               | 2.0      | 7                 | 17        |
| {Gd <sub>96</sub> Ni <sub>64</sub> }  | 42.8                                                               | 3.0      | 7                 | 18        |
| {Gd <sub>102</sub> Ni <sub>36</sub> } | 41.3                                                               | 2.0      | 7                 | 19        |
| {Gd <sub>42</sub> Co <sub>10</sub> }  | 41.3                                                               | 2.0      | 7                 | 20        |

|                                         |      |     |   |    |
|-----------------------------------------|------|-----|---|----|
| <b>{Gd<sub>78</sub>Ni<sub>64</sub>}</b> | 40.6 | 3.0 | 7 | 21 |
| <b>{Gd<sub>52</sub>Ni<sub>56</sub>}</b> | 40.5 | 3.0 | 7 | 22 |
| <b>{Gd<sub>45</sub>Co<sub>7</sub>}</b>  | 40.5 | 2.0 | 7 | 23 |
| <b>{Gd<sub>42</sub>Ni<sub>10</sub>}</b> | 38.2 | 2.0 | 7 | 20 |
| <b>{Gd<sub>24</sub>Co<sub>16</sub>}</b> | 26.0 | 3.8 | 7 | 24 |
| <b>{Gd<sub>24</sub>Cu<sub>36</sub>}</b> | 21.0 | 2.1 | 7 | 25 |

---

### 3. Supplementary Figures

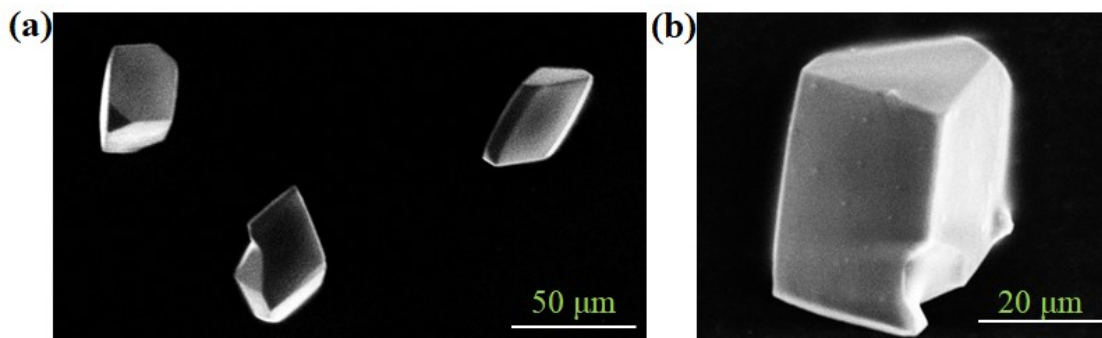

**Figure S1** SEM images of **1**.

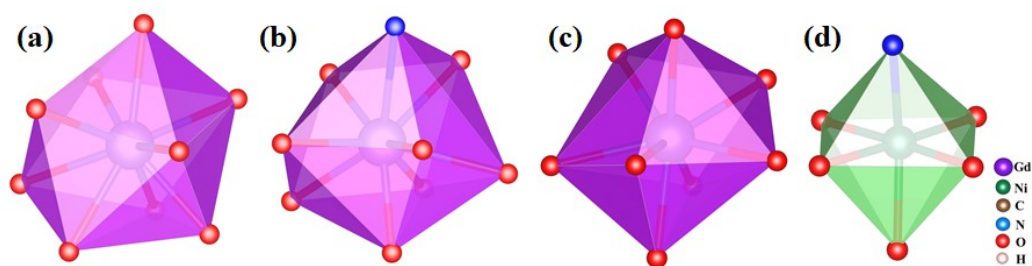

**Figure S2** The coordination mode of  $\text{Gd}^{3+}$  and  $\text{Ni}^{2+}$  in **1**. (a)  $[\text{GdO}_9]$  polyhedron; (b)  $[\text{GdO}_8\text{N}]$  polyhedron; (c)  $[\text{GdO}_8]$  polyhedron; (d)  $[\text{NiO}_5\text{N}]$  polyhedron.

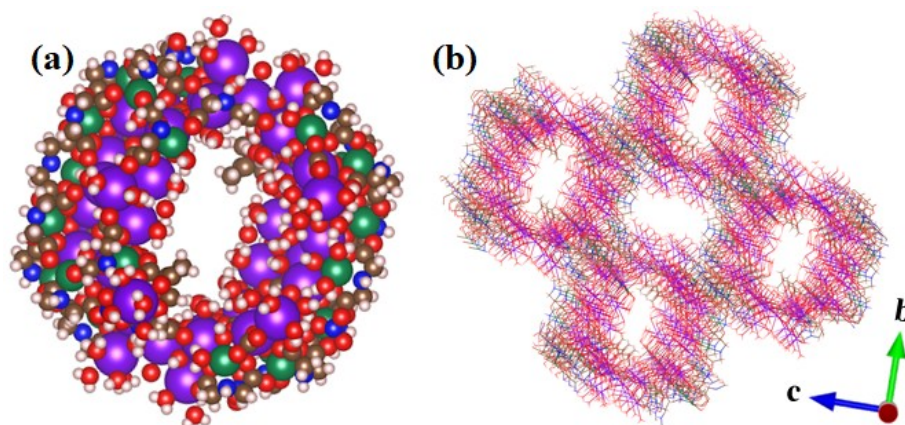

**Figure S3** (a) The space-filling view of **1**; (b) Wireframe view of the packing mode of **1** aggregation.

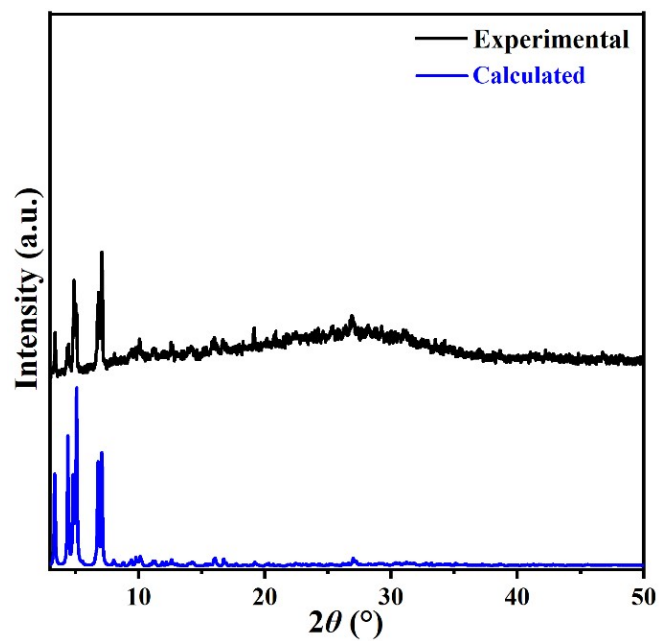

**Figure S4** Calculated and experimental XRD patterns for **1**. The red curve is the calculated one obtained from single-crystal X-ray structure analysis.

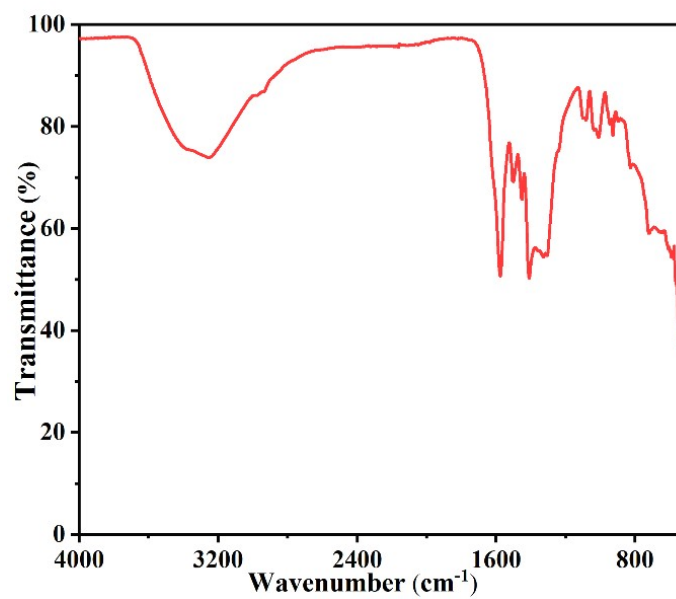

**Figure S5** FTIR spectra of **1**.

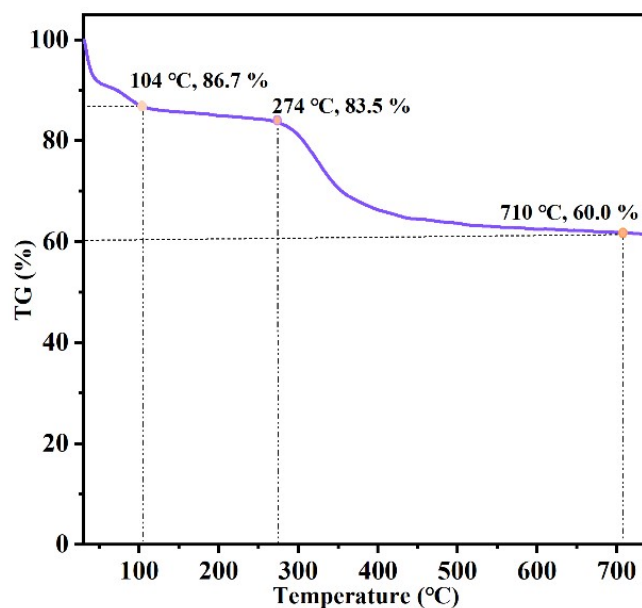

**Figure S6** The thermogravimetric (TG) analysis of **1**.

Note: The TGA curve of **1** was investigated under N<sub>2</sub> atmosphere. The weight loss from room temperature to 104 °C should be attributed to the departure of guest molecules, and the calculated loss is 12.9 % while the observed loss is 13.3 %. With the temperature increasing, the coordinated water molecules, nitrate and acetate ligands are gradually lost and the cluster starts to decompose. The residue with the weight of 60.0 % at 710 °C is considered as metallic oxide (Gd<sub>2</sub>O<sub>3</sub>, NiO).

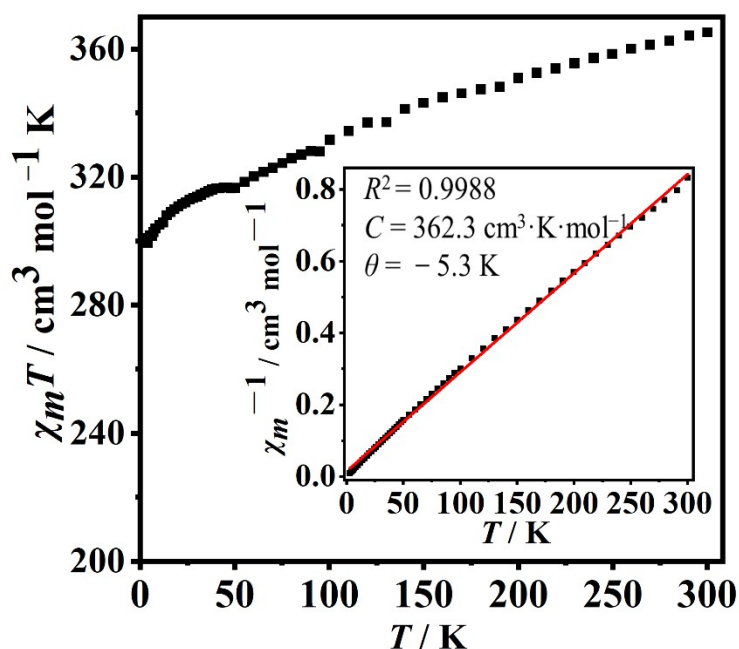

**Figure S7.** Plots of temperature dependence of  $\chi_m T$  vs  $T$  and  $\chi_m^{-1}$  vs  $T$  (inset) of wheel-like {Gd<sub>44</sub>Ni<sub>22</sub>} cluster.

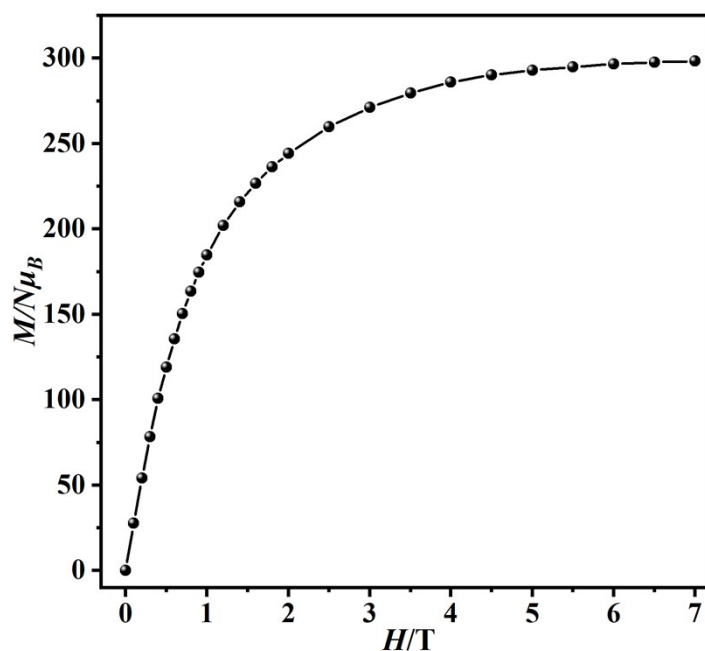

**Figure S8** Experimental magnetization curve of **1** at 2 K.

## References

- 1 G.Sheldrick, *Acta. Crystogr. A. Found. Crystogr.*, 2008, **64**, 112–122
- 2 O. Dolomanov, A. Blake, N. Champness and M. Schroder, Champness and M. Schroder, OLEX: new software for visualization and analysis of extended crystal structures, *J. Appl. Crystallogr.*, 2003, **36**, 1283–1284.
- 3 A. L. Spek, Single-crystal structure validation with the program PLATON, *J. Appl. Cryst.*, 2003, **36**, 7–11.
- 4 A. L. Spek, Structure validation in chemical crystallography, *Acta Cryst.*, 2009, **D65**, 148–155.
- 5 A. L. Spek, What makes a crystal structure report valid? *Inorg. Chim. Acta*, 2018, **470**, 232–237.
- 6 A. L. Spek, checkCIF validation ALERTS: what they mean and how to respond, *Acta Cryst.*, 2020, **E76**, 1–11.
- 7 X. M. Luo, Z. B. Hu, Q. F. Lin, W. W. Cheng, J. P. Cao, C. H. Cui, H. Mei, Y. Song and Y. Xu, Exploring the performance improvement of magnetocaloric effect based Gd-exclusive cluster Gd<sub>60</sub>, *J. Am. Chem. Soc.*, 2018, **140**, 11219–11222.
- 8 J. B. Peng, X. J. Kong, Q. C. Zhang, M. Orendac, J. Prokleska, Y. P. Ren, L. S. Long, Z. Zheng and L. S. Zheng, Beauty, symmetry, and magnetocaloric effect □ four-shell keplerates with 104 lanthanide atoms, *J. Am. Chem. Soc.*, 2014, **136**, 17938–17941.
- 9 L. X. Chang, G. Xing, L. Wang, P. Cheng and B. Zhao, A 24-Gd nanocapsule with a large magnetocaloric effect, *Chem. Commun.*, 2013, **49**, 1055–1057.
- 10 F. S. Guo, Y. C. Chen, L. L. Mao, W. Q. Lin, J. D. Leng, R. Tarasenko, M. Orendá č , J. Prokleš ka, V. Sechovsky and M. L. Tong, Anion-templated assembly and magnetocaloric properties of a nanoscale {Gd<sub>38</sub>} cage versus a {Gd<sub>48</sub>} barrel, *Chem. Eur. J.*, 2013, **19**,

- 14876–14885.
- 11 X. Y. Zheng, J. B. Peng, X. J. Kong, L. S. Long and L. S. Zheng, Mixed-anion templated cage-like lanthanide clusters: Gd<sub>27</sub> and Dy<sub>27</sub>, *Inorg. Chem. Front.*, 2016, **3**, 320–325.
  - 12 M. Y. Wu, F. L. Jiang, X. J. Kong, D. Q. Yuan, L. S. Long, S. A. AlThabaiti and M. C. Hong, Two polymeric 36-metal pure lanthanide nanosize clusters, *Chem. Sci.*, 2013, **4**, 3104–3109.
  - 13 Y. Zhou, X.Y. Zheng, J. Cai, Z. F. Hong, Z. H. Yan, X. J. Kong, Y. P. Ren, L. S. Long and L. S. Zheng, Three giant lanthanide clusters Ln<sub>37</sub> (Ln = Gd, Tb, and Eu) featuring a double-cage structure, *Inorg. Chem.*, 2017, **56**, 2037–2041.
  - 14 X. Y. Zheng, Y. H. Jiang, G. L. Zhuang, D. P. Liu, H. G. Liao, X. J. Kong, L. S. Long and L. S. Zheng, A gigantic molecular wheel of {Gd<sub>140</sub>}: a new member of the molecular wheel family, *J. Am. Chem. Soc.*, 2017, **139**, 18178–18181.
  - 15 F. S. Guo, Y. C. Chen, L. L. Mao, W. Q. Lin, J. D. Leng, R. Tarasenko, M. Orendáč, J. Prokleš ka, V. Sechovsky and M. L. Tong, Anion-templated assembly and magnetocaloric properties of a nanoscale {Gd<sub>38</sub>} cage versus a {Gd<sub>48</sub>} barrel, *Chem. Eur. J.*, 2013, **19**, 14876–14885.
  - 16 N. F. Li, X. M. Min, J. Wang, J. L. Wang, Y. Song, H. Mei and Y. Xu, Largest 3d-4f 196-nuclear Gd<sub>158</sub>Co<sub>38</sub> clusters with excellent magnetic cooling, *Sci China Chem*, 2022, **65**, 1577–1583.
  - 17 H. J. Lun, L. Xu, X. J. Kong, L. S. Long and L. S. Zheng, A high-symmetry double-shell Gd<sub>30</sub>Co<sub>12</sub> cluster exhibiting a large magnetocaloric effect, *Inorg. Chem.*, 2021, **60**, 10079–10083.
  - 18 W. P. Chen, P. Q. Liao, Y. Yu, Z. Zheng, X. M. Chen and Y. Z. Zheng, A mixed-ligand approach for a gigantic and hollow heterometallic cage {Ni<sub>64</sub>RE<sub>96</sub>} for gas separation and magnetic cooling applications, *Angew. Chem., Int. Ed.*, 2016, **55**, 9375–9379.
  - 19 W. P. Chen, P. Q. Liao, P. B. Jin, L. Zhang, B. K. Ling, S. C. Wang, Y. T. Chan, X. M. Chen and Y. Z. Zheng, The gigantic {Ni<sub>36</sub>Gd<sub>102</sub>} hexagon: a sulfate-templated “star-of-david” for photocatalytic CO<sub>2</sub> reduction and magnetic cooling, *J. Am. Chem. Soc.*, 2020, **142**, 4663–4670.
  - 20 J. B. Peng, Q. C. Zhang, X. J. Kong, Y. Z. Zheng, Y. P. Ren, L. S. Long, R. B. Huang, L. S. Zheng and Z. P. Zheng, High-nuclearity 3d-4f clusters as enhanced magnetic coolers and molecular magnets, *J. Am. Chem. Soc.*, 2012, **134**, 3314–3317.
  - 21 Q. F. Lin, J. Li, X. M. Luo, C. H. Cui, Y. Song and Y. Xu, Incorporation of silicon–oxygen tetrahedron into novel high-nuclearity nanosized 3d-4f heterometallic clusters, *Inorg. Chem.*, 2018, **57**, 4799–4802.
  - 22 D. P. Liu, X. P. Lin, H. Zhang, X. Y. Zheng, G. L. Zhuang, X. J. Kong, L. S. Long and L. S. Zheng, Magnetic properties of a single-molecule lanthanide–transition-metal compound containing 52 gadolinium and 56 nickel atoms, *Angew. Chem. Int. Ed.*, 2016, **55**, 4532–4536.
  - 23 S. Fan, S. H. Xu, X. Y. Zheng, Z. H. Yan, X. J. Kong, L. S. Long and L. S. Long, Four 3d-4f heterometallic Ln<sub>45</sub>M<sub>7</sub> clusters protected by mixed ligands, *CrystEngComm*, 2018, **20**, 2120–2125.
  - 24 Z. M. Zhang, L. Y. Pan, W. Q. Lin, J. D. Leng, F. S. Guo, Y. C. Chen, J. L. Liu and M. L. Tong, Wheel-shaped nanoscale 3d-4f {Co<sup>II</sup><sub>16</sub>Ln<sup>III</sup><sub>24</sub>} clusters (Ln= Dy and Gd), *Chem. Commun.*, 2013, **49**, 8081-8083.
  - 25 J. D. Leng, J. L. Liu and M. L. Tong, Unique nanoscale {Cu<sup>II</sup><sub>36</sub>Ln<sup>III</sup><sub>24</sub>} (Ln= Dy and Gd)

metallo-rings, *Chem. Commun.*, 2012, **48**, 5286–5288.
